# Supplementary material
Source: PubMed Central journal article supplement (PMC3755478)
Supplement: NIHMS466267-supplement-1.pdf [file NIHMS466267-supplement-1.pdf]

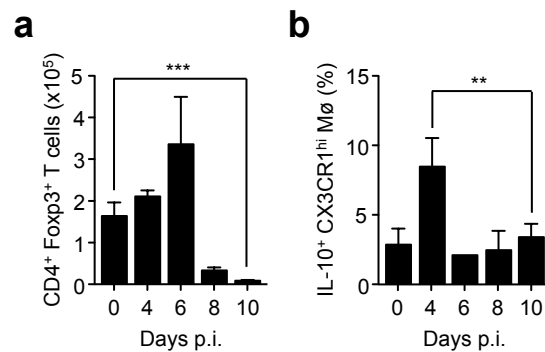

**Supplementary Figure 1: Collapse of Foxp3<sup>+</sup> Tregs, and reduced IL-10 production by CX3CR1<sup>hi</sup> resident macrophages during low-dose *T. gondii* infection.** C57BL/6 mice were orally infected with *T. gondii*. At various time points after infection the phenotype and function of specific immune cell subsets was analysed by flow-cytometry. **(a)** Absolute number of TCR-β<sup>+</sup>CD4<sup>+</sup>Foxp3<sup>+</sup> cells present in the small intestine Lp over the course of infection. **(b)** Assessment of the frequency of IL-10-producing CX3CR1<sup>hi</sup>CD11c<sup>hi</sup>MHCII<sup>hi</sup> resident macrophages by intracellular cytokine staining following 3 hr culture of single cell Lp suspensions in brefeldin A. Histograms represent the mean of individual animals ± SEM (n=3-4). Data are representative of two similar experiments. Statistical comparisons were performed using the Student's t test (\*p<0.05, \*\*p<0.01, \*\*\*p<0.001).

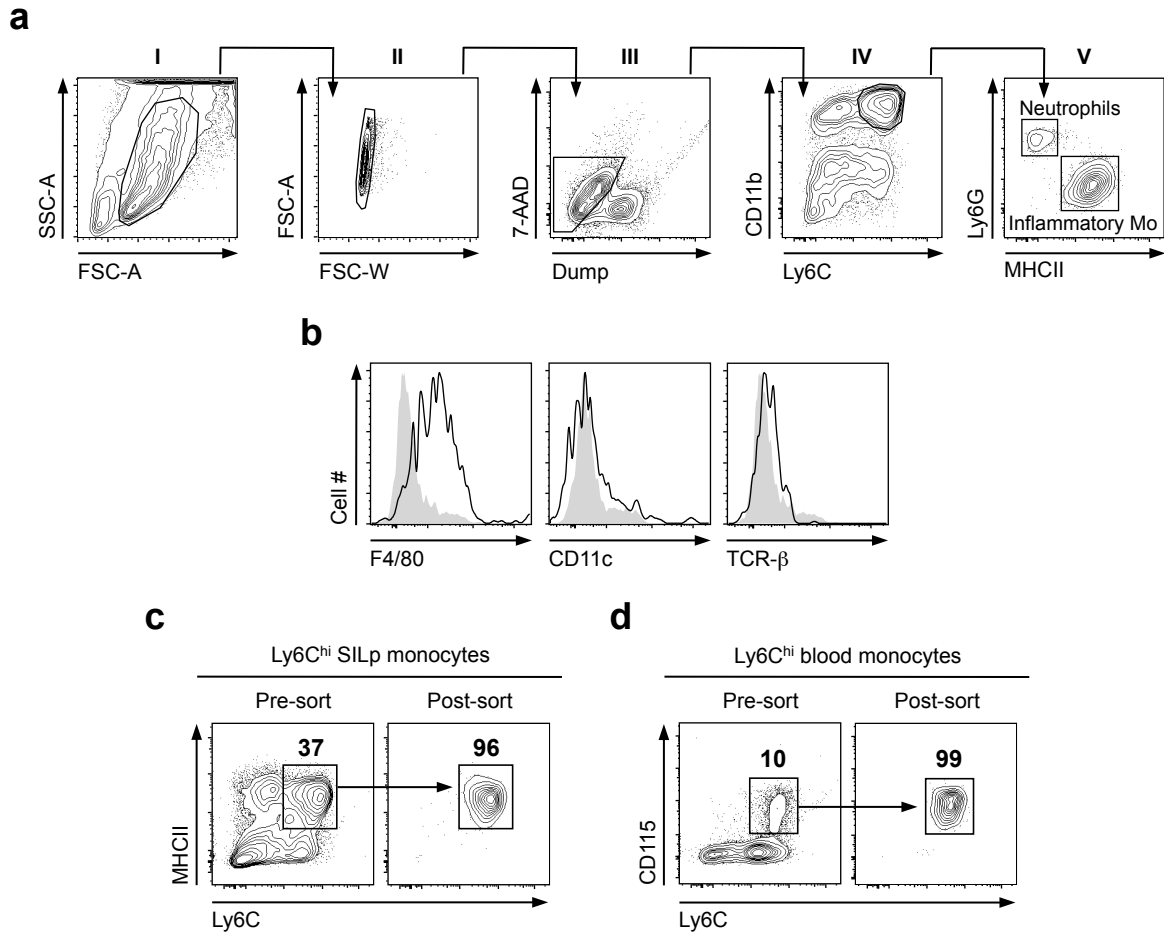

**Supplementary Figure 2: Gating, phenotyping, and sorting, of blood and small intestine Ly6<sup>ChI</sup> monocytes.** (a) Flow-cytometry gating strategy for Ly6<sup>ChI</sup> inflammatory monocytes (Mo) in single cell suspensions isolated from day 8 *T. gondii* infected small intestine lamina propria (SILp). Cells were identified as follows: (I) SSC-A versus FSC-A to remove cellular debris. (II) FSC-A versus FSC-W to exclude doublets. (III) 7-AAD versus Dump (CD3/B220) to identify live cells not expressing lymphocyte markers. (IV) CD11b versus Ly6C to gate recruited inflammatory cells. (V) Ly6G versus MHCII to distinguish neutrophils from Ly6<sup>ChI</sup> Mo. (b) Surface phenotyping of Ly6<sup>ChI</sup> Mo for F4/80, CD11c, and TCR-β. Gray shading, isotype control antibody. (c,d) Analysis of the purity of Ly6<sup>ChI</sup>(MHCII<sup>hi</sup>) small intestine Lp Mo, and Ly6<sup>ChI</sup> (CD115<sup>+</sup>) blood monocytes before, and after FACS isolation. Gated on live cells. Plots are of representative of animals from more than six experiments.

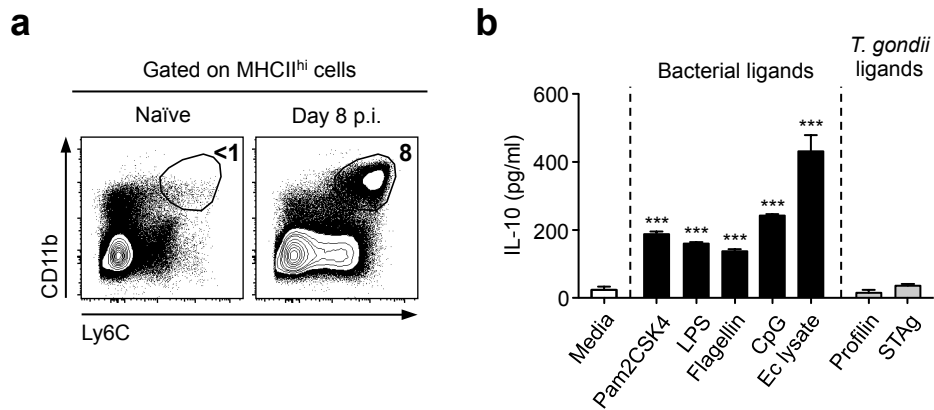

**Supplementary Figure 3: Ly6C<sup>hi</sup>MHCII<sup>hi</sup> cells are present in the spleen during *T. gondii* infection.** (a) Flow-cytometric staining of Ly6C<sup>hi</sup>MHCII<sup>hi</sup> monocytes in the spleen of C57BL/6 mice infected orally with *T. gondii* at day 8 after infection. Numbers refer to percentage of cells within gate. Plots are representative of animals from at least three separate experiments. (b) On day 8 p.i. Ly6C<sup>hi</sup> Mo were sorted by FACS and cultured for 18 hrs, alone, or in the presence of *T. gondii* ligands (left histogram) or bacterial ligands (right histogram). TNF- $\alpha$  was measured in triplicate supernatants by ELISA. Data are presented as mean  $\pm$  SEM. Statistical comparisons were performed using the Student's t test (\*p<0.05, \*\*p<0.01, \*\*\*p<0.001) compared to media alone.

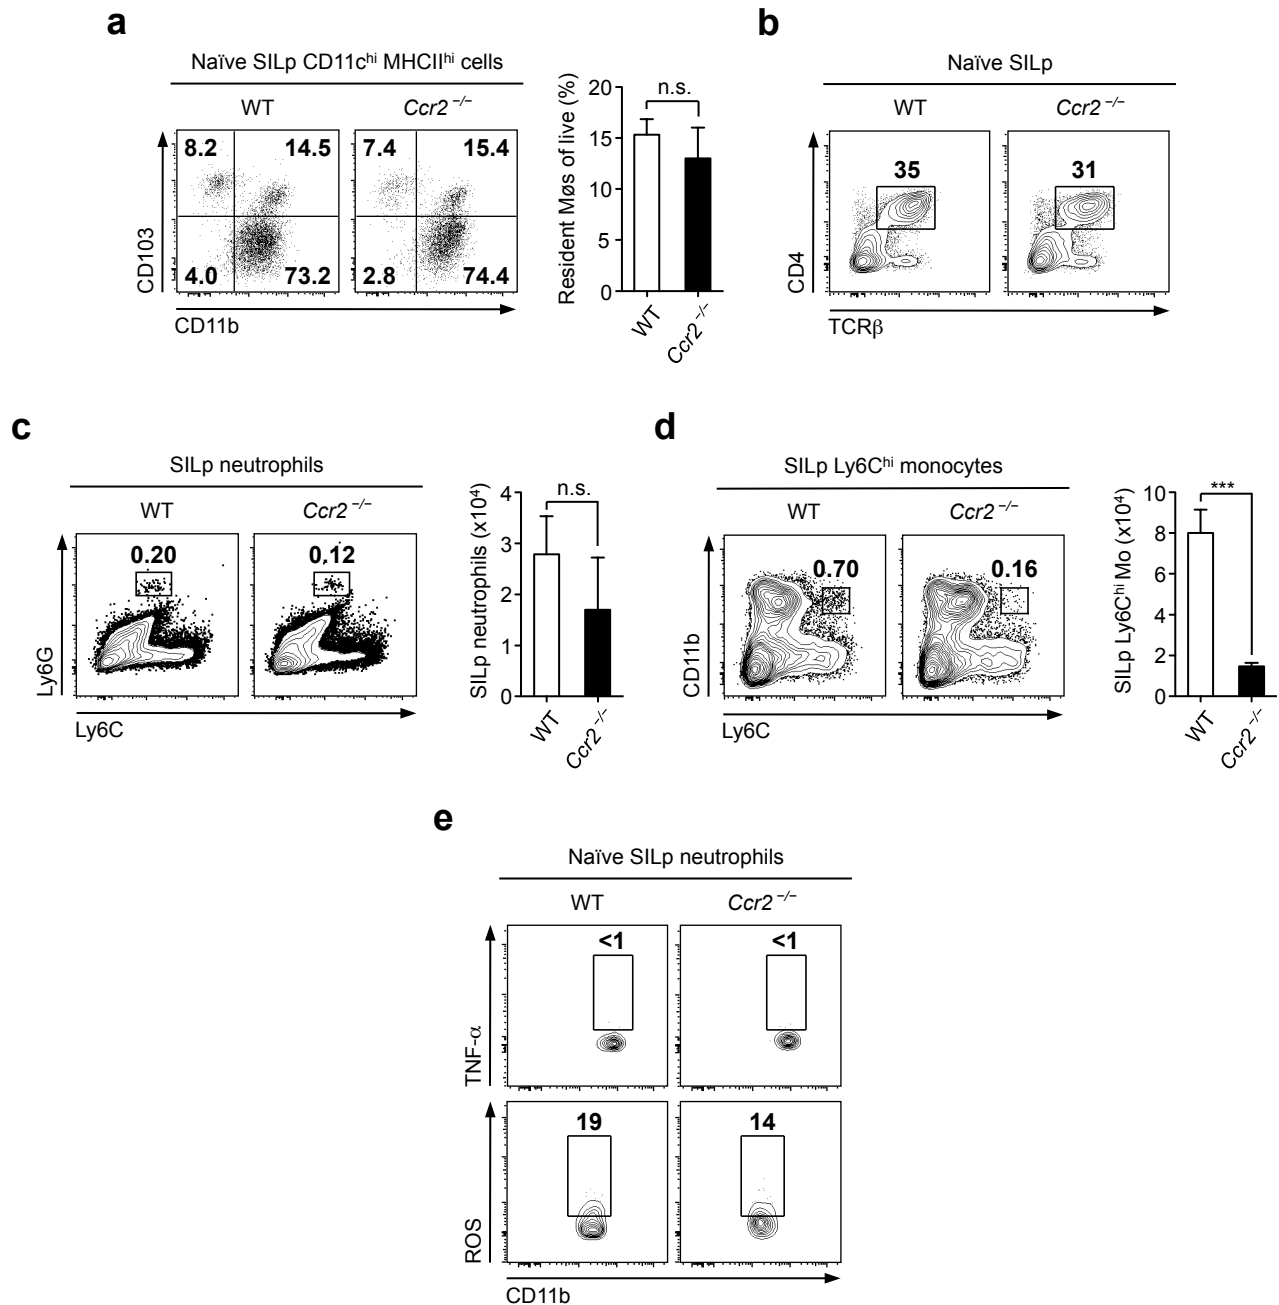

**Supplementary Figure 4: Steady-state assessment of SILp immune cell composition in *Ccr2*<sup>-/-</sup> mice.** (a) Frequencies of CD11b<sup>+</sup>CD103<sup>+</sup> DCs, CD11b<sup>-</sup>CD103<sup>+</sup> DCs and CD11b<sup>+</sup>CD103<sup>-</sup> resident Mø, within the total CD11c<sup>hi</sup>MHCII<sup>hi</sup> gate were assessed by flow-cytometry in naïve wild-type (WT) and *Ccr2*<sup>-/-</sup> animals. Graphical representation of frequency of resident Mø within the total live cell gate of FACS plots. (b) Flow-cytometric assessment of frequencies of CD4<sup>+</sup>TCRβ<sup>+</sup> T cells within the live cell gate of naïve WT and *Ccr2*<sup>-/-</sup> animals. (c) Frequency of neutrophils (Ly6G<sup>+</sup>Ly6C<sup>int</sup>) within the total live cell gate in naïve WT and *Ccr2*<sup>-/-</sup> animals. Graphical representation of absolute number of neutrophils in SILp of WT or *Ccr2*<sup>-/-</sup> animals. (d) Frequency of Ly6C<sup>hi</sup> monocytes (Ly6C<sup>hi</sup>CD11b<sup>hi</sup>) in naïve WT and *Ccr2*<sup>-/-</sup> animals. Graphical representation of absolute number of Ly6C<sup>hi</sup> monocytes in SILp of WT or *Ccr2*<sup>-/-</sup> animals of FACS plots. (e) Representative plots of TNF-α production and ROS production by neutrophils was assessed by flow-cytometry in WT and *Ccr2*<sup>-/-</sup> animals (n=3). Data are presented as mean ± SEM. Statistical comparisons were performed using the Student's t test (\*p<0.05, \*\*p<0.01, \*\*\*p<0.001). Data are representative of two independent experiments.

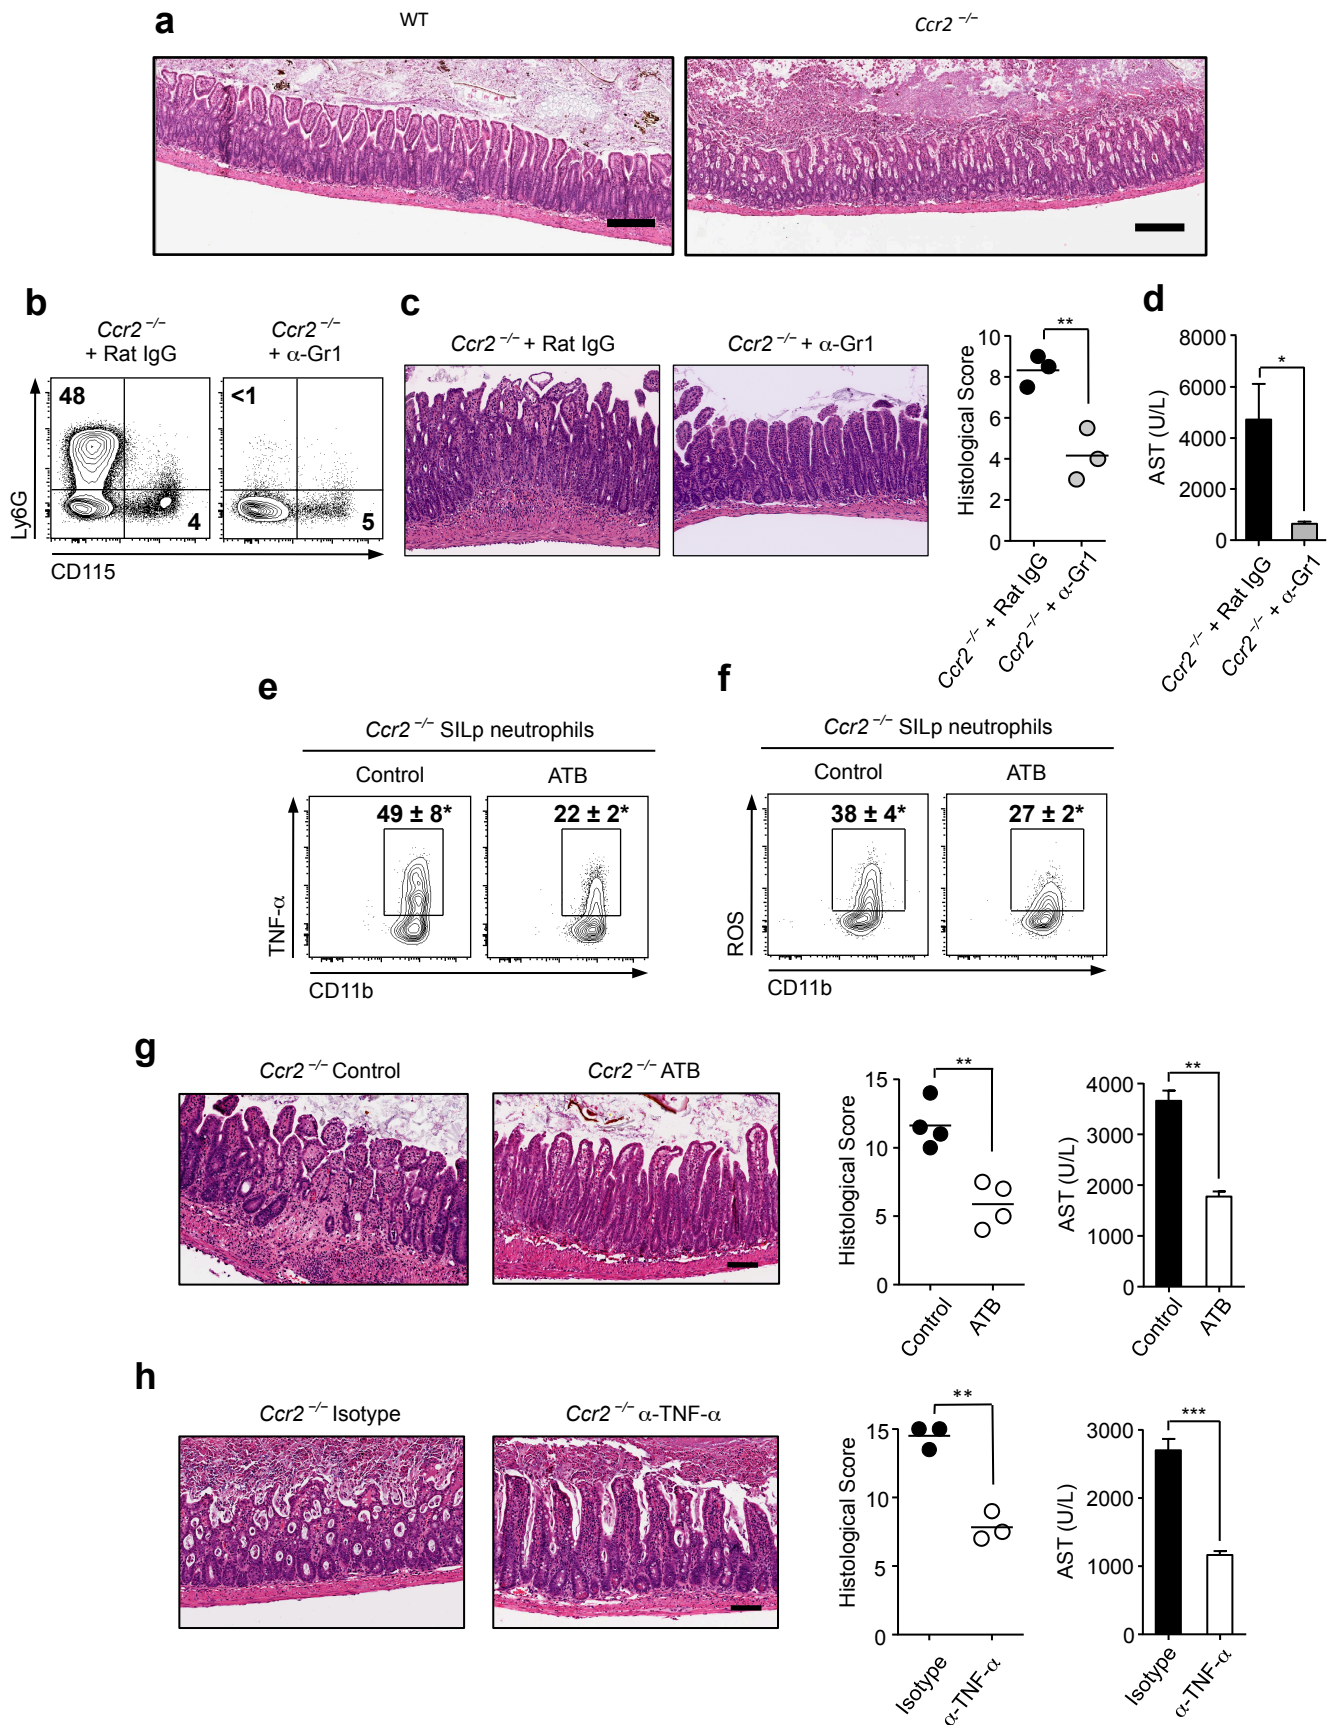

**Supplementary Figure 5: Commensal driven pathology in *Ccr2*<sup>-/-</sup> mice is neutrophils mediated.** (a) Representative H&E stained section of small intestine from day 8 infected WT and *Ccr2*<sup>-/-</sup> animals (scale bar 200uM) (b-d) Wild-type (WT) or *Ccr2*<sup>-/-</sup> mice were orally infected with *T. gondii*. On day 5 post infection (p.i.) *Ccr2*<sup>-/-</sup> animals were treated with anti-Gr1 antibody or isotype control. WT mice were treated with isotype only. (b) Representative FACS plots showing frequencies of neutrophils (Ly6G<sup>+</sup>CD11b<sup>+</sup>) and monocytes (CD115<sup>+</sup>) of total live cells in antibody-treated animals day 9 p.i. (c) Representative H&E stained section of small intestine in control and anti-Gr1 treated animals with graph depicting histological scoring. (d) AST sera levels were measured day 9 p.i. in control and anti-Gr1 treated animals. (e-g) *Ccr2*<sup>-/-</sup> mice were pre-treated with antibiotics (ATB) or not (control) and orally infected with *T. gondii*. Neutrophil activation and pathology were examined day 9 p.i. (e) SILp were treated with BFA for 3 hrs, and neutrophils were assessed for TNF- $\alpha$  production by intracellular cytokine staining. Numbers represent the percentage of cells in each quadrant. Bar graph summarizes the average mean fluorescence intensity (MFI) of TNF- $\alpha$  in neutrophils (n=3). (f) SILp neutrophils were assessed for the production of reactive oxygen species (ROS) by flow-cytometry. Bar graphs summarize the mean percentage of ROS<sup>+</sup> cells, and MFI of ROS,  $\pm$  SEM. (n=3). (g) Representative H&E stained section of small intestine from day 9 infected control and antibiotic (ATB) treated *Ccr2*<sup>-/-</sup> animals. AST sera levels were measured at day 9 p.i. from control or ATB treated *Ccr2*<sup>-/-</sup> animals with graph depicting histological scoring. (h) *T. gondii* orally infected *Ccr2*<sup>-/-</sup> mice were treated with anti-TNF- $\alpha$  antibody or isotype control on day 5 and 8 p.i. Representative H&E stained section of small intestine from day 9 infected control or anti-TNF- $\alpha$  treated animals with graph depicting histological scoring. AST sera levels were measured at day 9 p.i. of control or anti-TNF- $\alpha$  treated animals (n=3). Data are presented as mean  $\pm$  SEM. Data are representative of two independent experiments. Statistical comparisons were performed using the Student's t test (\*p<0.05, \*\*p<0.01, \*\*\*p<0.001).

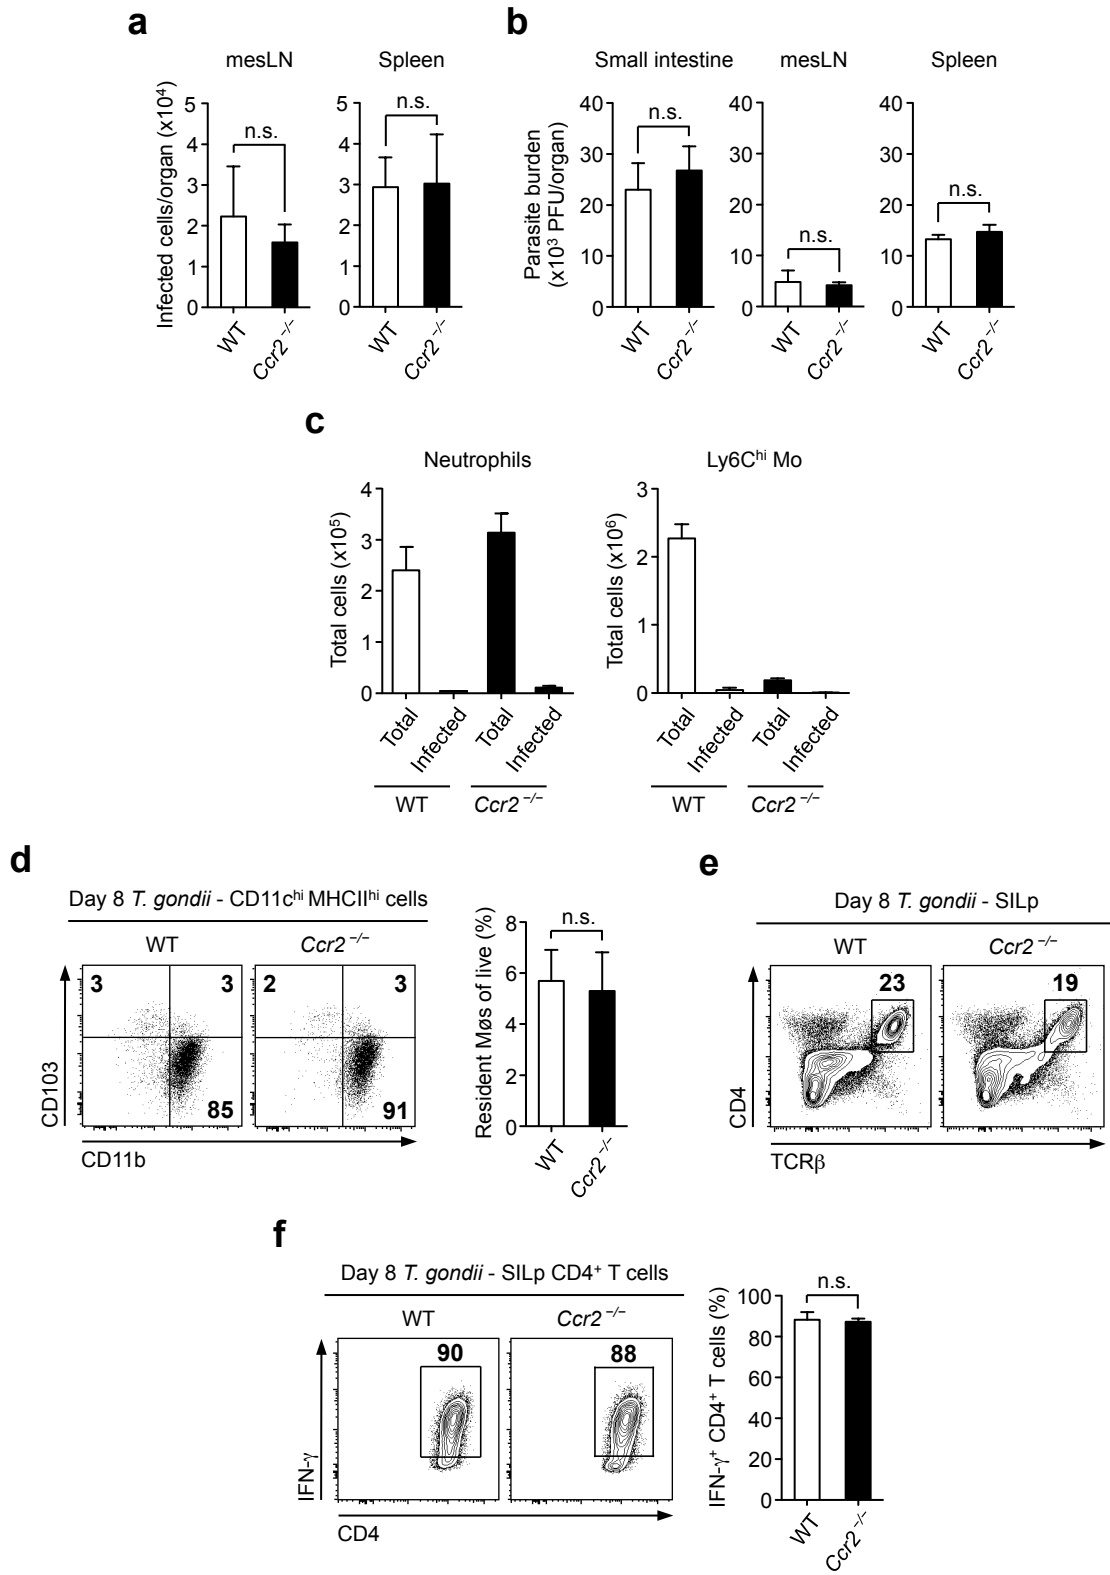

**Supplementary Figure 6: Total numbers of neutrophils, parasite load and T<sub>H</sub>1 responses are unaltered in *Ccr2*<sup>-/-</sup> mice.** (a) Absolute number of *T. gondii* infected cells in mesLN and spleen of wild-type (WT) and *Ccr2*<sup>-/-</sup> animals, assessed by flow-cytometry day 8 p.i. (b) Parasite burden assessed by plaque assay in the SILp, mesLN, and spleen day 8 p.i. (c) Absolute numbers, and total numbers of infected cells, of neutrophils and Ly6C<sup>hi</sup> Mo in SILp of WT and *Ccr2*<sup>-/-</sup> day 8 p.i. Parasite burden was assessed by flow-cytometry. (d) Representative FACS plots showing frequencies of CD103<sup>+</sup> DCs, and resident Mφs within the CD11c<sup>hi</sup>MHCI<sup>hi</sup> gate of infected mice. Bar graphs summarize the mean percentage of resident Mφs as a proportion of live cells. (e) Representative FACS plots showing proportion of CD4<sup>+</sup> T cells of total live cells at day 8 p.i. (f) SILp was restimulated for 3 hrs with PMA and ionomycin in the presence of BFA and CD4<sup>+</sup> production of IFN-γ was assessed by intracellular cytokine staining. Representative FACS plots are shown (n=3). Bar graph summarizes the mean percentage of IFN-γ<sup>+</sup> cells, ± SEM (n=3). Data are presented as mean ± SEM. Statistical comparisons were performed using the Student's t test (\*p<0.05, \*\*p<0.01, \*\*\*p<0.001). Data are representative of two independent experiments.



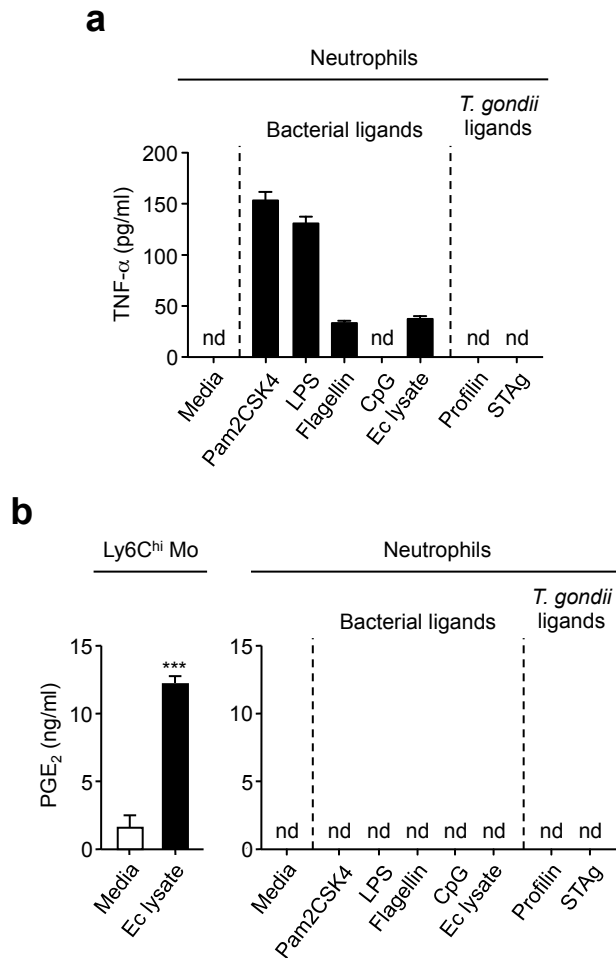

**Supplementary Figure 7: Neutrophils produce TNF- $\alpha$  but not PGE<sub>2</sub> in response to bacterial products.** (a) On day 8 p.i. Ly6G<sup>+</sup> neutrophils were sorted by FACS from the SILp and cultured for 18 hrs, alone, or in the presence of *T. gondii* ligands or bacterial ligands. TNF- $\alpha$  was measured in triplicate supernatants by ELISA. Data are presented as mean  $\pm$  SEM. (b) Levels of PGE<sub>2</sub> as measured by EIA in supernatant from overnight culture of neutrophils or Ly6C<sup>hi</sup> Mo. Data are representative of three independent experiments, results shown as mean  $\pm$  SEM. Statistical comparisons were performed using the Student's t test (\* $p$ <0.05, \*\* $p$ <0.01, \*\*\* $p$ <0.001).

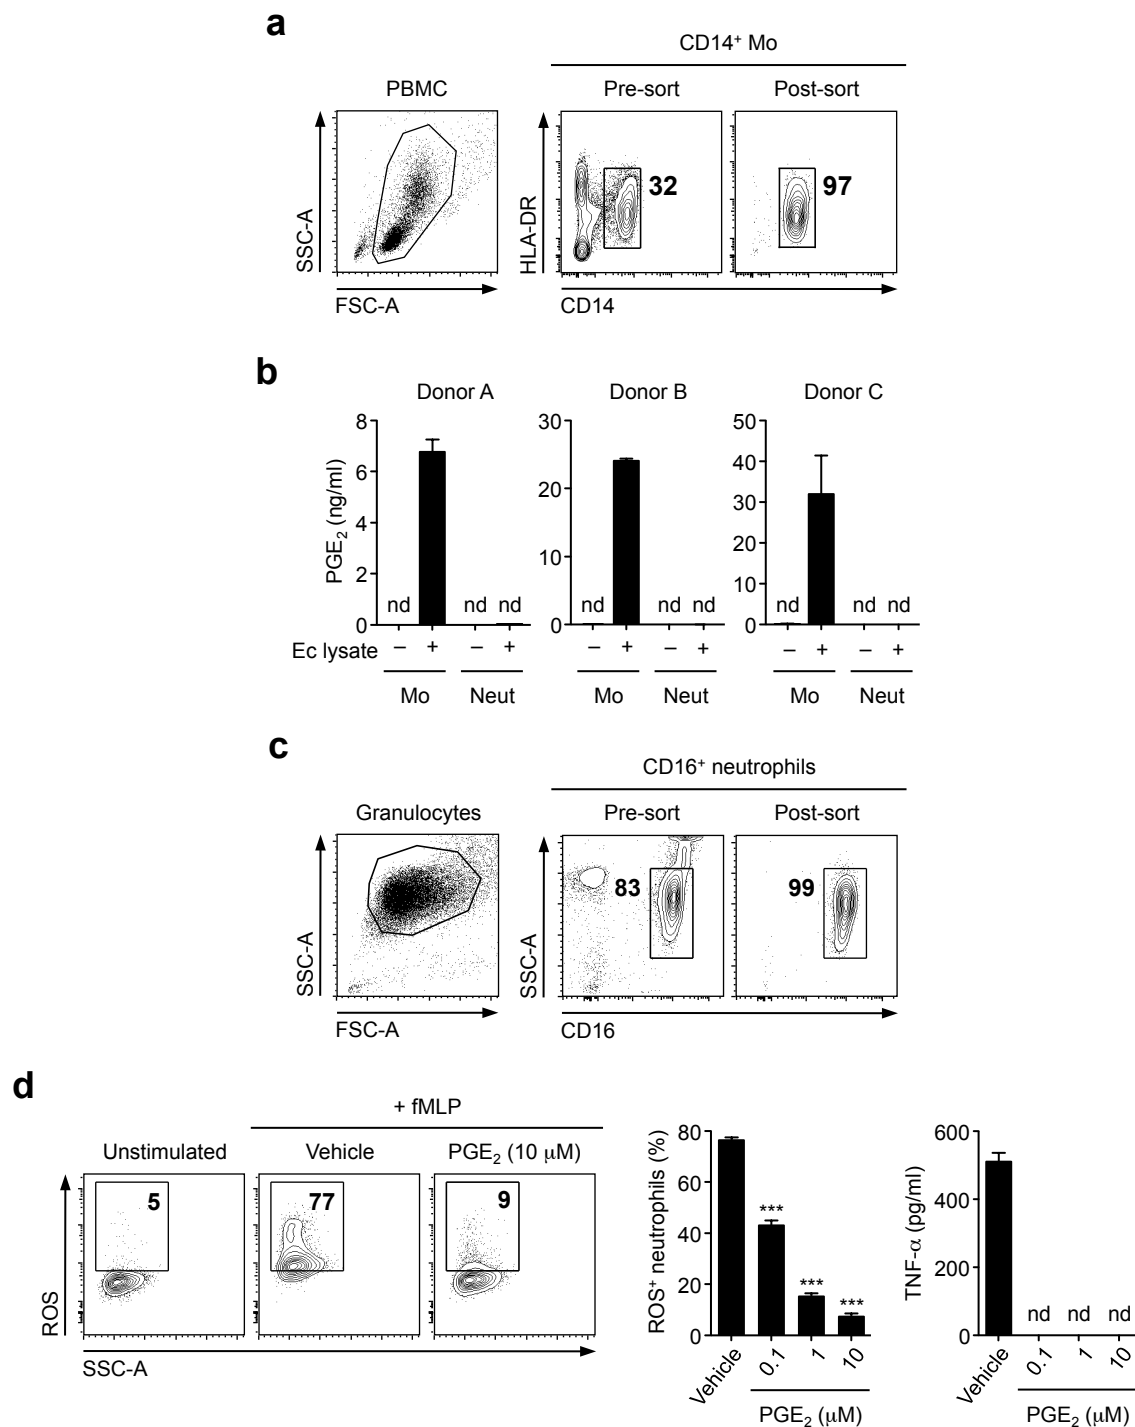

**Supplementary Figure 8: Human CD14<sup>+</sup> monocytes, but not neutrophils, produce PGE<sub>2</sub> in response to commensal stimuli.** (a) Highly pure human CD14<sup>+</sup> monocytes (Mo) were FACS sorted from peripheral blood mononuclear cells (PBMC) of healthy donors. (b) Purified populations from individual donors were cultured alone or in the presence of *E. coli* lysate for 18 hrs and PGE<sub>2</sub> measured in triplicate supernatants by EIA. (c) Neutrophils (CD16<sup>+</sup>) were FACS sorted from the granulocyte fraction of the same donors. (d) Purified neutrophils were treated with fMLP, for 30 minutes, and ROS-production was assessed by flow-cytometry. Alternatively, purified neutrophils were treated with *E. coli* lysate without or in the presence of PGE<sub>2</sub> for 18 hrs. TNF-α was measured in triplicate supernatants by ELISA. (n.d., not detected.) Results are shown as ± SEM (n=3). Statistical comparisons were performed using the Student's t test (\*p<0.05, \*\*p<0.01, \*\*\*p<0.001). Data are representative of three individual donors.

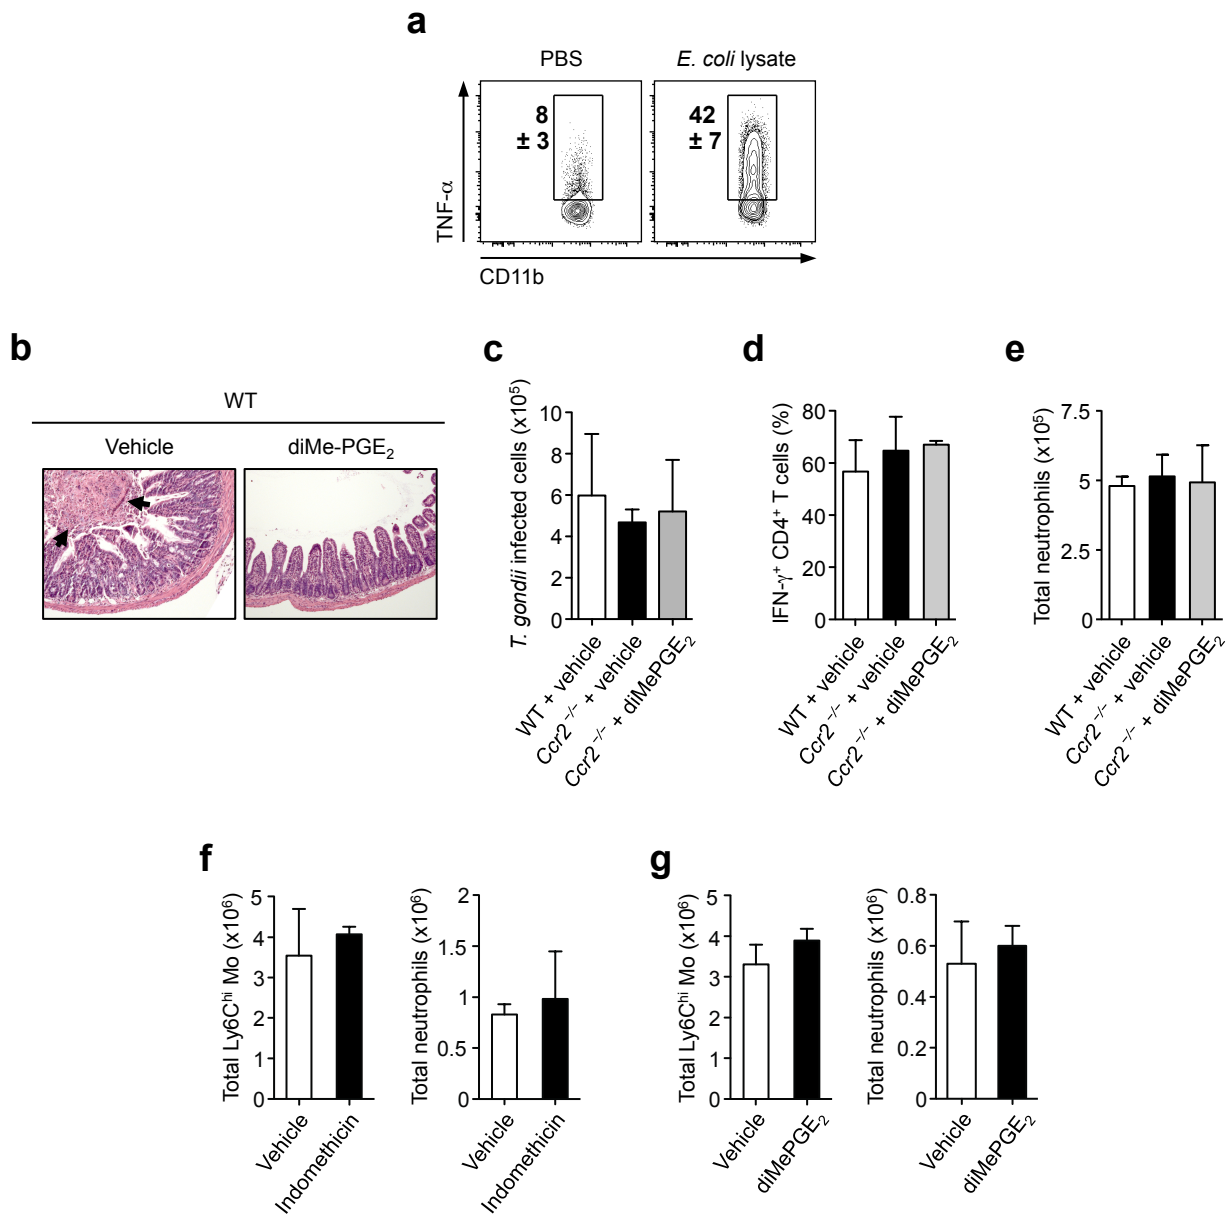

**Supplementary Figure 9: Commensal stimuli drive neutrophil activation in intraperitoneal *T. gondii* infection and manipulation of PGE<sub>2</sub> does not impact T cell activation or cell recruitment during infection. (a)** C57BL/6 mice were intraperitoneally (i.p.) infected with 20 cysts *T. gondii*. To activate neutrophils mice were i.p. injected on day 4 p.i. with *E. coli* lysate or PBS. Peritoneal lavage cells were harvested and cultured in the presence of BFA for 3 hrs and neutrophil production of TNF- $\alpha$  was assessed by intracellular cytokine staining. Representative FACS plots of TNF- $\alpha$  production by PEC neutrophils (Ly6G<sup>+</sup>CD11b<sup>hi</sup>). **(b)** *T. gondii* infected WT mice were treated with 16,16-dimethyl (diMe) PGE<sub>2</sub> or vehicle control from days 6-8 p.i. Histological analysis of ileums from infected WT mice treated with diMePGE<sub>2</sub> or vehicle control. **(c-e)** WT and *Ccr2*<sup>-/-</sup> mice were orally infected with *T. gondii* and treated with diMePGE<sub>2</sub> or vehicle control and SILp was assessed for **(c)** parasite burden, **(d)** frequency of IFN $\gamma$  producing CD4<sup>+</sup> T cells and **(e)** absolute number of Ly6G<sup>+</sup> neutrophils were assessed by flow cytometry. Histograms represent the mean of individual animals  $\pm$  SEM (n=3-4). **(f-g)** WT mice were orally infected with *T. gondii* and treated with either **(f)** indomethacin or **(g)** diMePGE<sub>2</sub> or appropriate vehicle controls from days 6-8 p.i. Absolute numbers of Ly6C<sup>hi</sup> monocytes and Ly6G<sup>+</sup> neutrophils from the SILp. Histograms represent the mean of individual animals  $\pm$  SEM (n=3-4). Statistical comparisons were performed using the Student's t test (\*p<0.05, \*\*p<0.01, \*\*\*p<0.001). Data are representative of two independent experiments.

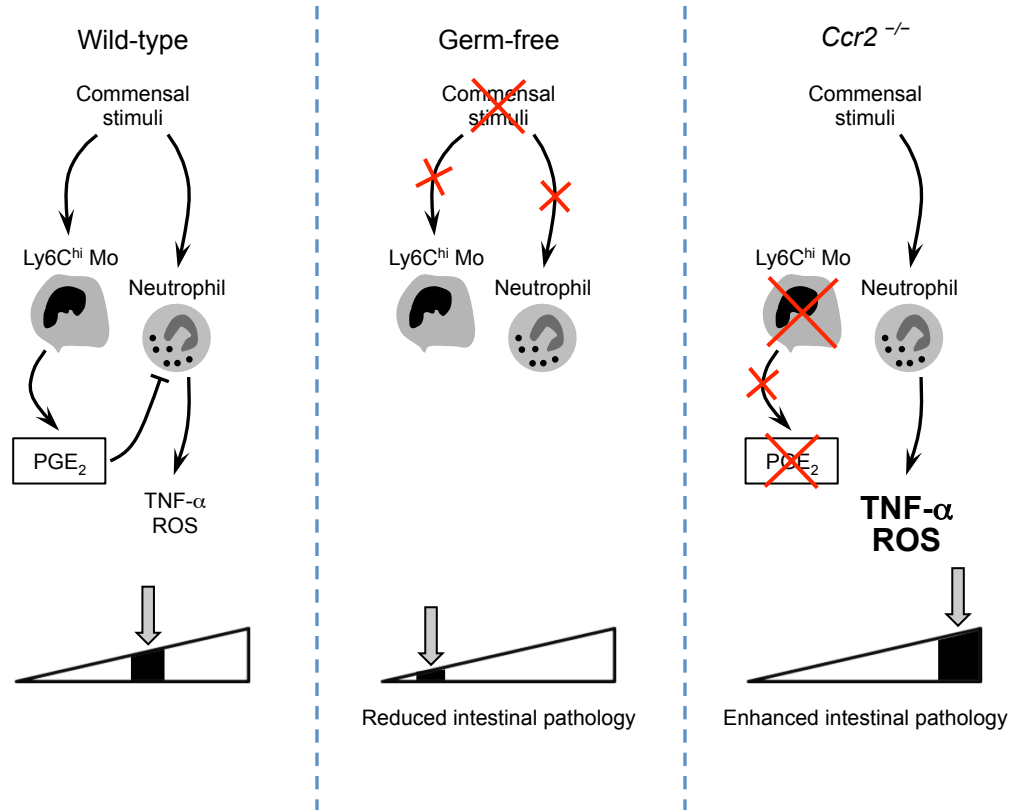

**Supplementary Figure 10: Commensal-driven PGE<sub>2</sub> production by Ly6C<sup>hi</sup> Mo regulates neutrophil activation in acute gastrointestinal infection.** During acute gastrointestinal infection, as a result of mucosal damage and enhanced exposure to commensals Ly6C<sup>hi</sup> Mo and neutrophils are exposed to commensal products. In response to commensal ligands, neutrophils release pro-inflammatory factors including TNF-α and reactive oxygen species (ROS). Ly6C<sup>hi</sup> Mo produce regulatory factors such as the lipid mediator PGE<sub>2</sub> in response to commensals. PGE<sub>2</sub> potently suppresses neutrophil activation and as a result of this regulatory loop neutrophil responses are controlled, limiting immunopathology. Infection of germ-free animals results in limited neutrophil responses due to the absence of commensal signals, and intestinal pathology is reduced as a result. In the absence of Ly6C<sup>hi</sup> Mo as occurs in *Ccr2*<sup>-/-</sup> animals PGE<sub>2</sub> levels are reduced, leading to dysregulated neutrophil responses towards the commensal microbiota and increased immunopathology.
